# Supplementary material
Source: HighWire-hosted journal article supplement (https://bjsm.bmj.com/content/57/19/1227)

**Supplementary Image 1:** Google trends of “10,000 steps” 2004-February 2023. Numbers on the Y-axis represent search interest relative to the highest point on the chart for the given region and time. A value of 100 is the peak popularity for the term. A value of 50 means that the term is half as popular.

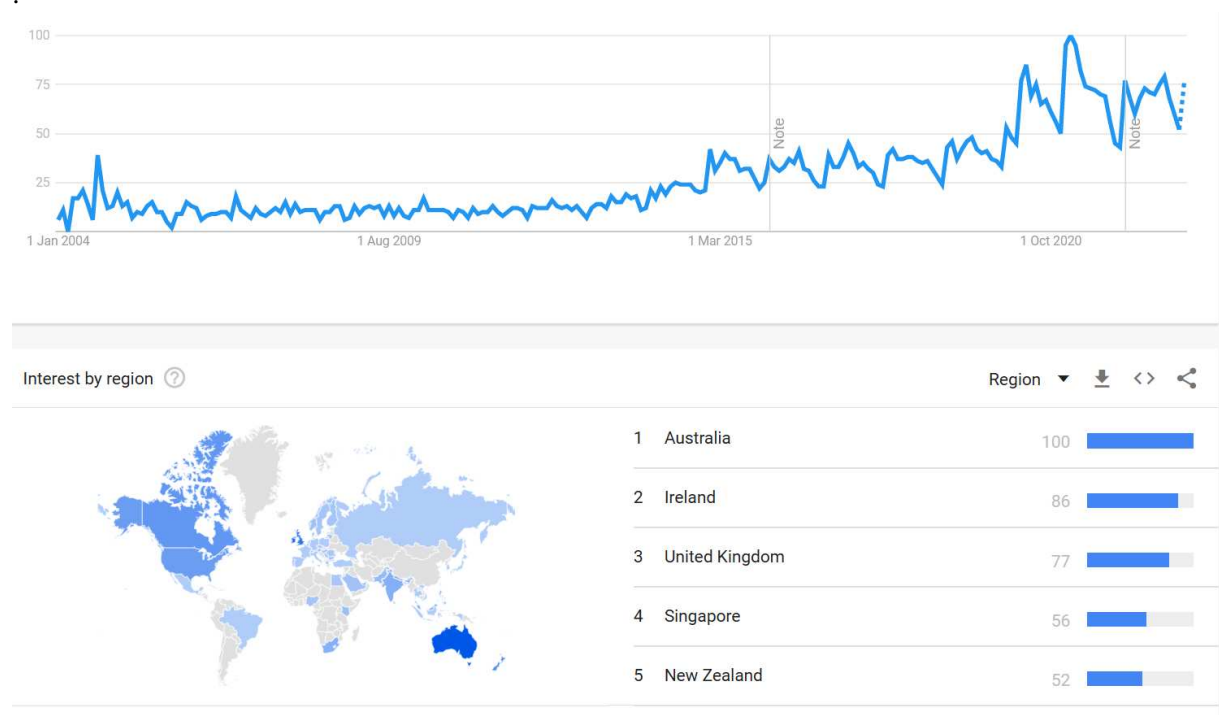

Supplement: inline-supplementary-material-1 [file inline-supplementary-material-1.pdf]
